# Supplementary material for: First Occurrence of Titanian Hydroxylclinohumite in Marble-Hosting Gem Spinel Deposits, Luc Yen, Vietnam
Source: MDPI journal article supplement (doi:10.3390/min13070901), 2023-07-02
Supplement: s1 [file s1]

# Supplementary Materials:

**Table S1.** Fractional atomic coordinates and equivalent isotropic displacement parameters ( $\text{\AA}^2$ ) for hydroxylclinohumite V\_11\_2d sample.

| Site | occupancy                             | <i>x/a</i>  | <i>y/b</i>  | <i>z/c</i> | <i>U</i> <sup>ani</sup> |
|------|---------------------------------------|-------------|-------------|------------|-------------------------|
| Si1  | Si                                    | 0.42665(8)  | 0.56618(4)  | 0.88940(3) | 0.00457(10)             |
| Si2  | Si                                    | 0.07615(8)  | 0.17667(4)  | 0.33514(3) | 0.00477(10)             |
| Mg1  | Mg                                    | 0.50276(10) | 0.05382(5)  | 0.22576(4) | 0.00629(12)             |
| Mg2  | Mg                                    | 0.48862(11) | 0.63998(5)  | 0.66979(4) | 0.00660(12)             |
| Mg3  | Mg                                    | 0           | ½           | 1          | 0.00621(15)             |
| Mg4  | Mg                                    | 0.50910(11) | 0.25018(5)  | 0.88801(4) | 0.00620(12)             |
| Mg5  | Mg <sub>0.91</sub> Ti <sub>0.09</sub> | 0.00573(10) | 0.38107(5)  | 0.54195(4) | 0.00789(12)             |
| O1   | O                                     | 0.2774(2)   | 0.65868(10) | 0.98642(8) | 0.0066(2)               |
| O2   | O                                     | 0.2781(2)   | 0.41991(10) | 0.88774(8) | 0.00590(19)             |
| O3   | O                                     | 0.7666(2)   | 0.56452(10) | 0.88800(8) | 0.0055(2)               |
| O4   | O                                     | 0.2767(2)   | 0.61238(10) | 0.79342(8) | 0.0062(2)               |
| O5   | O                                     | 0.2223(2)   | 0.03146(10) | 0.33719(8) | 0.0062(2)               |
| O6   | O                                     | 0.2244(2)   | 0.22056(10) | 0.23788(8) | 0.0065(2)               |
| O7   | O                                     | -0.2642(2)  | 0.17709(10) | 0.33714(8) | 0.0060(2)               |
| O8   | O                                     | 0.2278(2)   | 0.27260(10) | 0.43042(8) | 0.0069(2)               |
| O9   | O <sub>0.63</sub> F <sub>0.37</sub>   | 0.2383(2)   | 0.54592(10) | 0.55528(8) | 0.0106(2)               |
| H9   | H <sub>0.445</sub>                    | 0.388(6)    | 0.507(4)    | 0.514(2)   | 0.57(19)                |

**Table S2.** Selected interatomic distances for hydroxylclinohumite V\_11\_2d sm.

|           |            |           |            |              |            |
|-----------|------------|-----------|------------|--------------|------------|
| Si1 – O1  | 1.6361(11) | Mg1 – O6  | 2.1392(11) | Mg4 – O1     | 2.2368(12) |
| Si1 – O2  | 1.6514(11) | Mg1 – O7  | 2.0974(11) | Mg4 – O1     | 2.0561(11) |
| Si1 – O3  | 1.6109(11) | <Mg1 – O> | 2.1005     | Mg4 – O2     | 2.0548(11) |
| Si1 – O4  | 1.6373(11) |           |            | Mg4 – O3     | 2.1783(11) |
| <Si1 – O> | 1.6339     | Mg2 – O4  | 2.0293(12) | Mg4 – O4     | 2.1916(11) |
|           |            | Mg2 – O5  | 2.0628(11) | Mg4 – O5     | 2.0688(12) |
| Si2 – O5  | 1.6456(11) | Mg2 – O6  | 2.1900(12) | <Mg4 – O>    | 2.1310     |
| Si2 – O6  | 1.6385(11) | Mg2 – O7  | 2.1720(11) |              |            |
| Si2 – O7  | 1.6126(11) | Mg2 – O8  | 2.2233(12) | Mg5 – O9     | 2.0085(11) |
| Si2 – O8  | 1.6401(11) | Mg2 – O9  | 2.0516(11) | Mg5 – O5     | 2.1839(11) |
| <Si2 – O> | 1.6342     | <Mg2 – O> | 2.1215     | Mg5 – O7     | 2.1544(12) |
|           |            |           |            | Mg5 – O8     | 2.1397(11) |
| Mg1 – O2  | 2.0818(11) | Mg3 – O1  | 2.1255(10) | ×2 Mg5 – O8  | 2.0048(11) |
| Mg1 – O3  | 2.1025(11) | Mg3 – O2  | 2.0694(10) | ×2 Mg5 – O9  | 1.9954(11) |
| Mg1 – O4  | 2.1171(11) | Mg3 – O3  | 2.0931(10) | ×2 <Mg5 – O> | 2.0811     |
| Mg1 – O5  | 2.0651(11) | <Mg3 – O> | 2.096      |              |            |

**Table S3.** Fractional atomic coordinates and equivalent isotropic displacement parameters ( $\text{\AA}^2$ ) for hydroxylclinohumite V\_11\_2a sample.

| Site | occupancy                             | $x/a$        | $y/b$         | $z/c$      | $U^{\text{ani}}$ |
|------|---------------------------------------|--------------|---------------|------------|------------------|
| Si1  | Si                                    | 0.42667(7)   | 0.56630(3)    | 0.88941(2) | 0.00438(8)       |
| Si2  | Si                                    | 0.07611(6)   | 0.17667(3)    | 0.33511(2) | 0.00454(8)       |
| Mg1  | Mg                                    | 0.50282(8)   | 0.05375(4)    | 0.22572(3) | 0.00611(10)      |
| Mg2  | Mg                                    | 0.48851(8)   | 0.63994(4)    | 0.66976(3) | 0.00634(10)      |
| Mg3  | Mg                                    | 0            | $\frac{1}{2}$ | 1          | 0.00588(12)      |
| Mg4  | Mg                                    | 0.50893(8)   | 0.25029(4)    | 0.88806(3) | 0.00590(9)       |
| Mg5  | Mg <sub>0.90</sub> Ti <sub>0.10</sub> | 0.00559(8)   | 0.38118(4)    | 0.54188(3) | 0.00787(9)       |
| O1   | O                                     | 0.27770(17)  | 0.65859(8)    | 0.98642(6) | 0.00641(16)      |
| O2   | O                                     | 0.27847(17)  | 0.41984(8)    | 0.88778(6) | 0.00605(16)      |
| O3   | O                                     | 0.76672(17)  | 0.56451(8)    | 0.88810(6) | 0.00549(16)      |
| O4   | O                                     | 0.27667(17)  | 0.61229(8)    | 0.79352(6) | 0.00632(16)      |
| O5   | O                                     | 0.22225(17)  | 0.03149(8)    | 0.33727(6) | 0.00628(16)      |
| O6   | O                                     | 0.22423(17)  | 0.22039(8)    | 0.23794(6) | 0.00638(16)      |
| O7   | O                                     | -0.26423(17) | 0.17724(8)    | 0.33725(6) | 0.00620(16)      |
| O8   | O                                     | 0.22734(17)  | 0.27229(8)    | 0.43033(6) | 0.00696(16)      |
| O9   | O <sub>0.67</sub> F <sub>0.33</sub>   | 0.23803(18)  | 0.54570(8)    | 0.55516(6) | 0.01036(17)      |
| H9   | H <sub>0.465</sub>                    | 0.401(5)     | 0.520(4)      | 0.5139(19) | 0.13(3)          |

**Table S4.** Selected interatomic distances for hydroxylclinohumite V\_11\_2a sample.

|           |           |           |            |              |            |
|-----------|-----------|-----------|------------|--------------|------------|
| Si1 – O2  | 1.6529(9) | Mg1 – O3  | 2.1027(9)  | Mg4 – O1     | 2.2368(12) |
| Si1 – O4  | 1.6359(9) | Mg1 – O7  | 2.0995(9)  | Mg4 – O1     | 2.0561(11) |
| Si1 – O1  | 1.6346(8) | <Mg1 – O> | 2.1014     | Mg4 – O2     | 2.0548(11) |
| Si1 – O3  | 1.6122(9) |           |            | Mg4 – O3     | 2.1783(11) |
| <Si1 – O> | 1.6339    | Mg2 – O5  | 2.0631(9)  | Mg4 – O4     | 2.1916(11) |
|           |           | Mg2 – O4  | 2.0313(9)  | Mg4 – O5     | 2.0688(12) |
| Si2 – O5  | 1.6459(9) | Mg2 – O6  | 2.1921(9)  | <Mg4 – O>    | 2.1311     |
| Si2 – O6  | 1.6370(9) | Mg2 – O8  | 2.2264(9)  |              |            |
| Si2 – O8  | 1.6373(9) | Mg2 – O9  | 2.0537(9)  | Mg5 – O9     | 2.0085(11) |
| Si2 – O7  | 1.6137(9) | Mg2 – O7  | 2.1713(9)  | Mg5 – O5     | 2.1839(11) |
| <Si2 – O> | 1.6334    | <Mg2 – O> | 2.1230     | Mg5 – O7     | 2.1544(12) |
|           |           |           |            | Mg5 – O8     | 2.1397(11) |
| Mg1 – O5  | 2.0671(9) | Mg3 – O1  | 2.1255(10) | ×2 Mg5 – O8  | 2.0048(11) |
| Mg1 – O2  | 2.0838(9) | Mg3 – O2  | 2.0694(10) | ×2 Mg5 – O9  | 1.9954(11) |
| Mg1 – O4  | 2.1160(9) | Mg3 – O3  | 2.0931(10) | ×2 <Mg5 – O> | 2.0811     |
| Mg1 – O6  | 2.1395(9) | <Mg3 – O> | 2.096      |              |            |

**Table S5.** Fractional atomic coordinates and equivalent isotropic displacement parameters ( $\text{\AA}^2$ ) for hydroxylclinohumite V\_12\_03 sample.

| Site | occupancy                             | $x/a$       | $y/b$         | $z/c$      | $U^{\text{ani}}$ |
|------|---------------------------------------|-------------|---------------|------------|------------------|
| Si1  | Si                                    | 0.42647(8)  | 0.56627(4)    | 0.88952(3) | 0.00426(10)      |
| Si2  | Si                                    | 0.07614(8)  | 0.17663(4)    | 0.33507(3) | 0.00447(10)      |
| Mg1  | Mg                                    | 0.50285(9)  | 0.05375(5)    | 0.22568(4) | 0.00605(12)      |
| Mg2  | Mg                                    | 0.48814(10) | 0.64000(5)    | 0.66995(4) | 0.00637(12)      |
| Mg3  | Mg                                    | 0           | $\frac{1}{2}$ | 1          | 0.00596(15)      |
| Mg4  | Mg                                    | 0.50900(10) | 0.25023(5)    | 0.88801(4) | 0.00587(12)      |
| Mg5  | Mg <sub>0.89</sub> Ti <sub>0.11</sub> | 0.00543(10) | 0.38179(5)    | 0.54168(4) | 0.00778(12)      |
| O1   | O                                     | 0.2773(2)   | 0.65863(10)   | 0.98643(8) | 0.0062(2)        |
| O2   | O                                     | 0.2783(2)   | 0.41997(10)   | 0.88777(8) | 0.0056(2)        |
| O3   | O                                     | 0.7668(2)   | 0.56438(10)   | 0.88811(8) | 0.0054(2)        |
| O4   | O                                     | 0.2763(2)   | 0.61239(10)   | 0.79359(8) | 0.0058(2)        |
| O5   | O                                     | 0.2227(2)   | 0.03147(10)   | 0.33710(8) | 0.0059(2)        |
| O6   | O                                     | 0.2245(2)   | 0.22057(10)   | 0.23802(8) | 0.0062(2)        |
| O7   | O                                     | -0.2642(2)  | 0.17695(10)   | 0.33701(8) | 0.0057(2)        |
| O8   | O                                     | 0.2276(2)   | 0.27230(10)   | 0.43047(8) | 0.0067(2)        |
| O9   | O <sub>0.68</sub> F <sub>0.32</sub>   | 0.2396(2)   | 0.54571(10)   | 0.55482(8) | 0.0107(2)        |
| H9   | H                                     | 0.383(6)    | 0.509(4)      | 0.511(2)   | 0.22(7)          |

**Table S6.** Selected interatomic distances for hydroxylclinohumite V\_12\_03 sample.

|           |            |           |            |           |            |            |
|-----------|------------|-----------|------------|-----------|------------|------------|
| Si1 – O2  | 1.6508(11) | Mg1 – O3  | 2.1022(11) | Mg4 – O1  | 2.0541(11) |            |
| Si1 – O4  | 1.6373(11) | Mg1 – O7  | 2.0969(11) | Mg4 – O1  | 2.1899(11) |            |
| Si1 – O1  | 1.6349(11) | <Mg1 – O> | 2.1001     | Mg4 – O2  | 2.0572(12) |            |
| Si1 – O3  | 1.6127(11) |           |            | Mg4 – O3  | 2.2373(12) |            |
| <Si1 – O> | 1.6339     | Mg2 – O5  | 2.0651(11) | Mg4 – O4  | 2.0714(12) |            |
|           |            | Mg2 – O4  | 2.0300(12) | Mg4 – O5  | 2.1802(11) |            |
| Si2 – O5  | 1.6458(11) | Mg2 – O6  | 2.1896(12) | <Mg4 – O> | 2.1317     |            |
| Si2 – O6  | 1.6371(11) | Mg2 – O8  | 2.2291(12) |           |            |            |
| Si2 – O8  | 1.6401(11) | Mg2 – O9  | 2.0538(12) | Mg5 – O9  | 2.1839(11) |            |
| Si2– O7   | 1.6131(11) | Mg2 – O7  | 2.1718(11) | Mg5 – O5  | 2.0072(11) |            |
| <Si2 – O> | 1.6340     | <Mg2 – O> | 2.1232     | Mg5 – O7  | 2.1438(11) |            |
|           |            |           |            | Mg5 – O8  | 1.9919(11) |            |
| Mg1 – O5  | 2.0644(11) | Mg3 – O1  | 2.1248(10) | ×2        | Mg5 – O8   | 2.0018(12) |
| Mg1 – O2  | 2.0822(11) | Mg3 – O2  | 2.0701(10) | ×2        | Mg5 – O9   | 2.1625(12) |
| Mg1 – O4  | 2.1153(11) | Mg3 – O3  | 2.0913(10) | ×2        | <Mg5 – O>  | 2.0819     |
| Mg1 – O6  | 2.1395(11) | <Mg3 – O> | 2.0954     |           |            |            |
